# Supplementary material for: New AKT-dependent mechanisms of anti-COVID-19 action of high-CBD Cannabis sativa extracts
Source: Springer Nature journal article supplement (doi:10.1038/s41420-022-00876-y), 2022-03-11

# Original image: Figure 1A

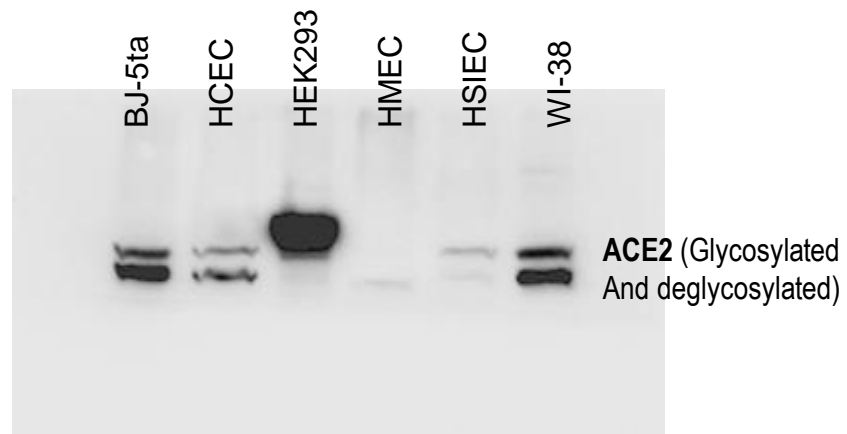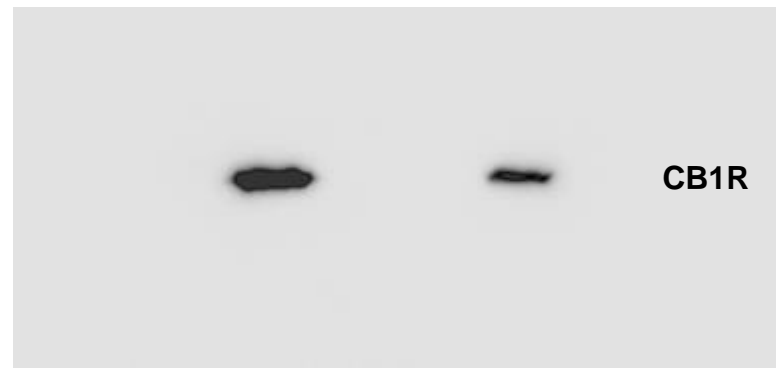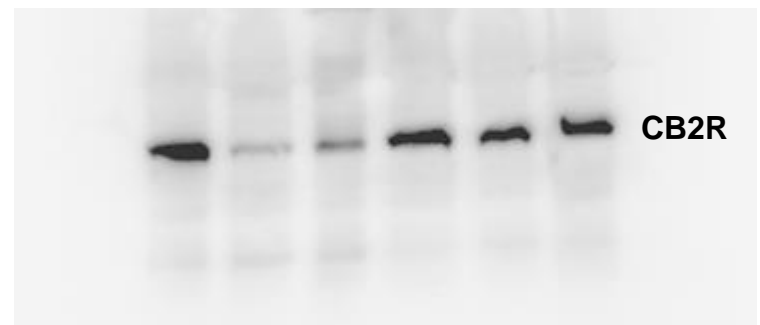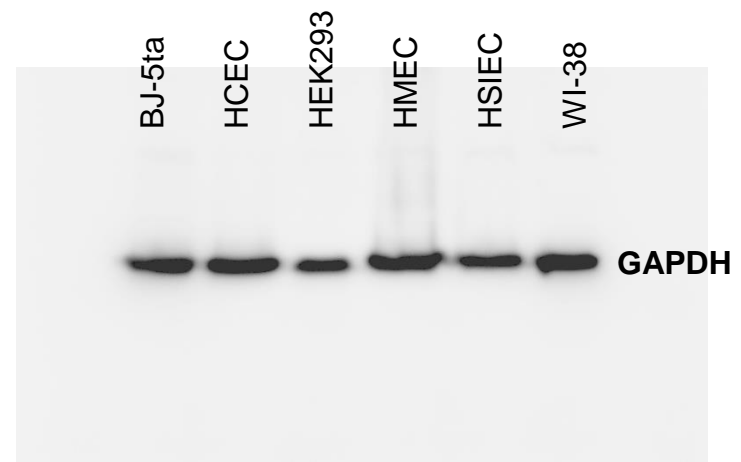

# Original image: Figure 1B and 1C

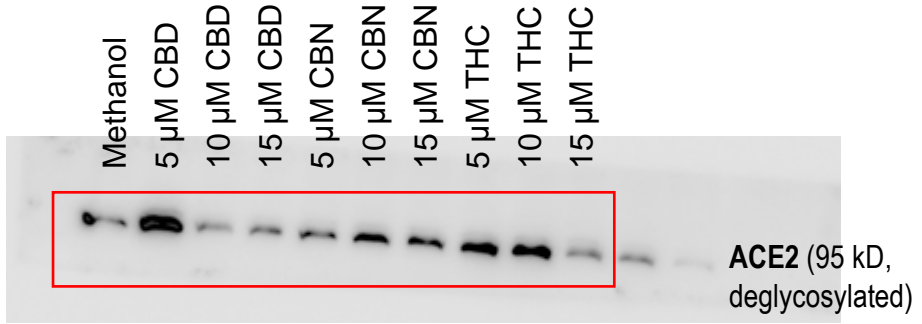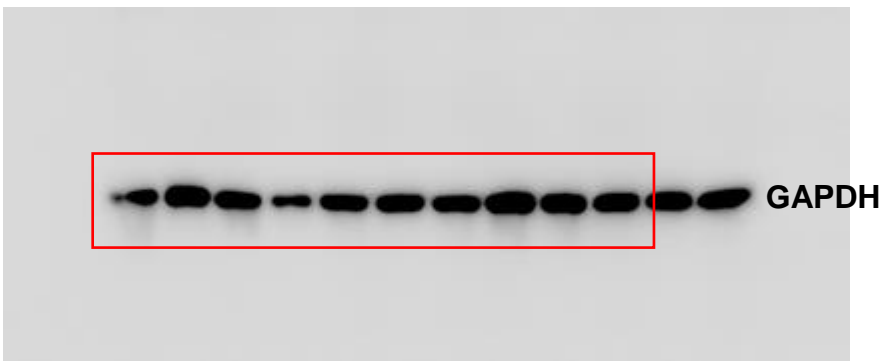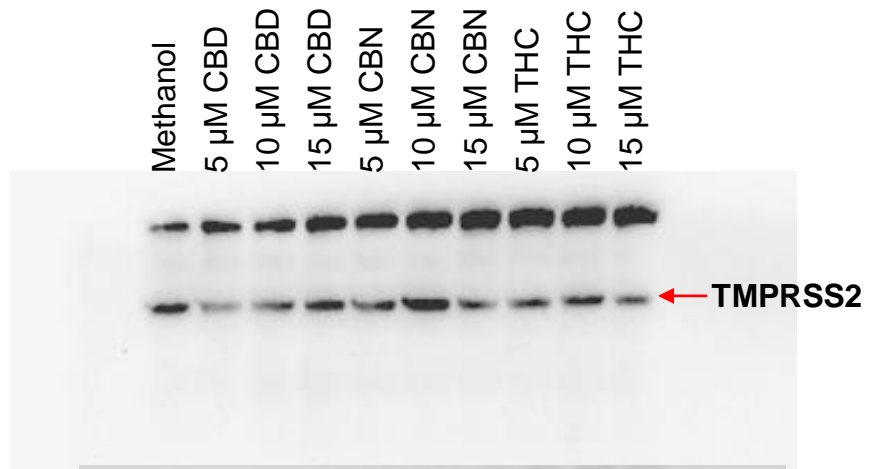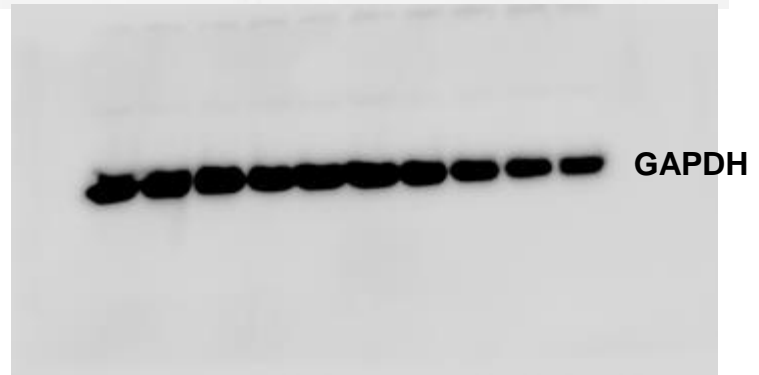

# Original image: Figure 1D

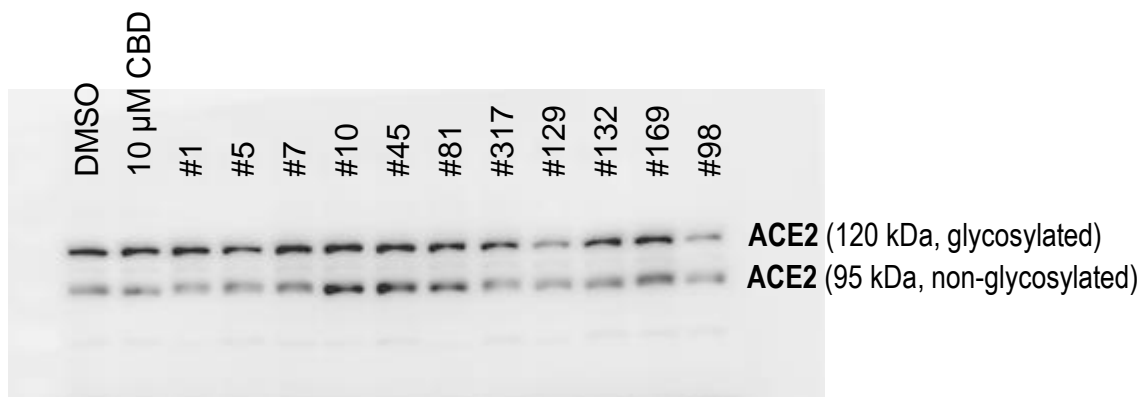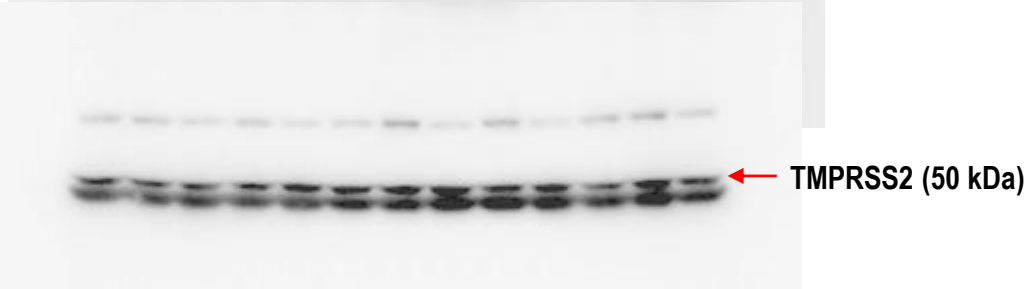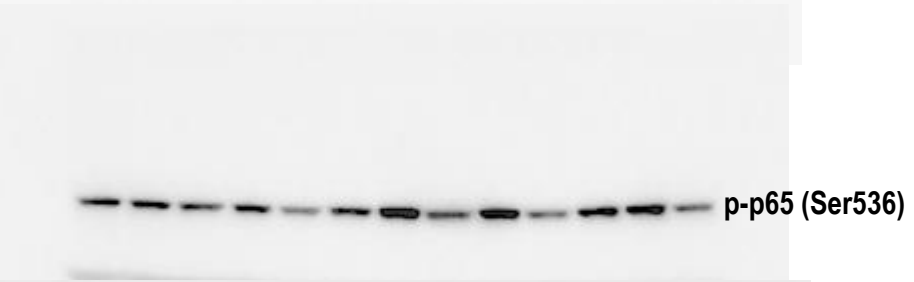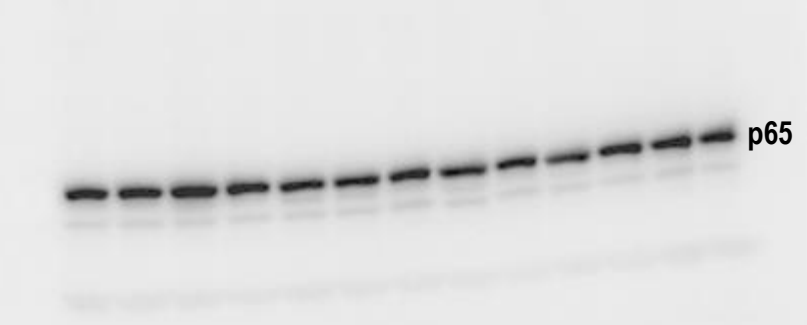

# Original image: Figure 1D

DMSO  
10  $\mu$ M CBD  
#1 #5 #7 #10 #45 #81 #317 #129 #132 #169 #98

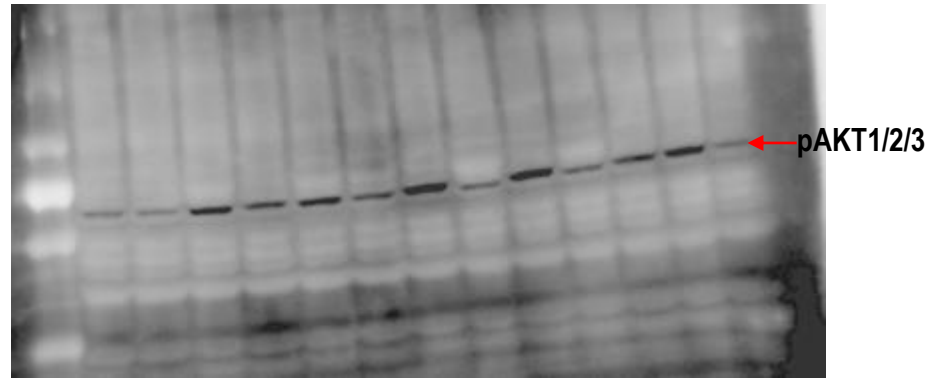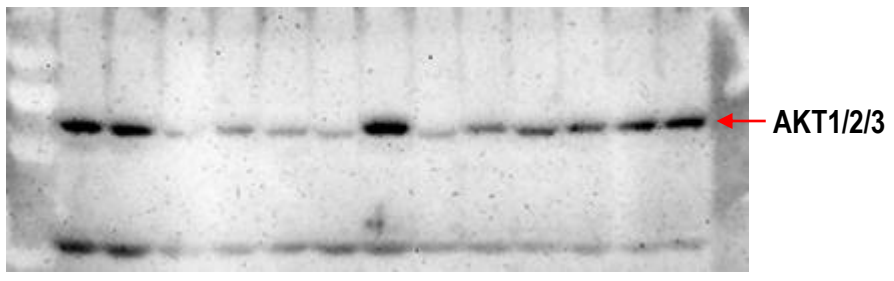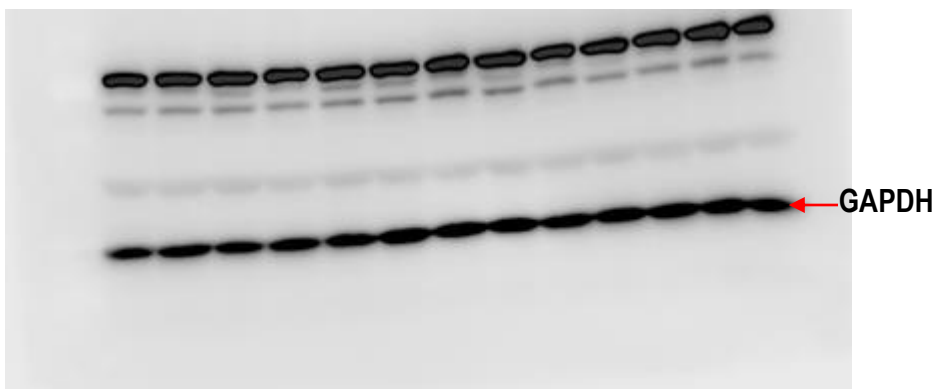

# Original image: Figure 1E

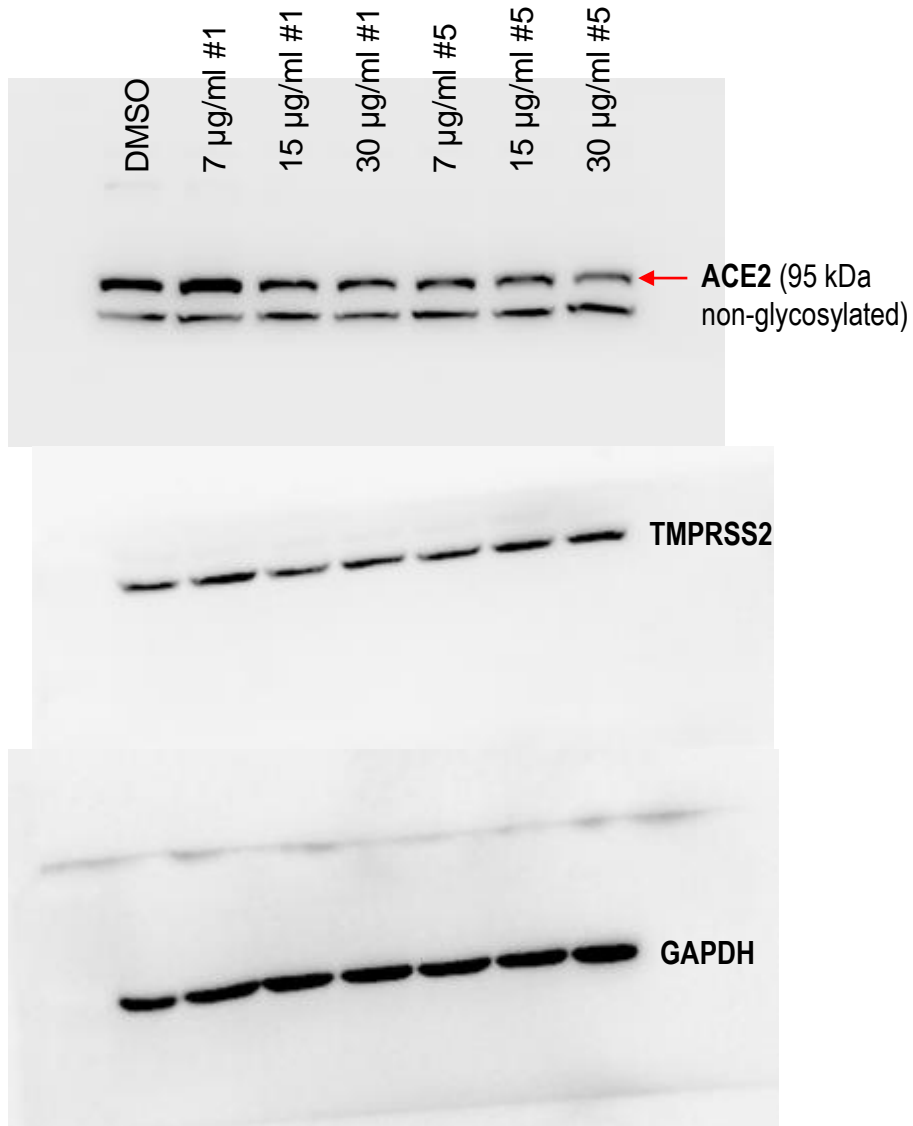

# Original image: Figure 2E

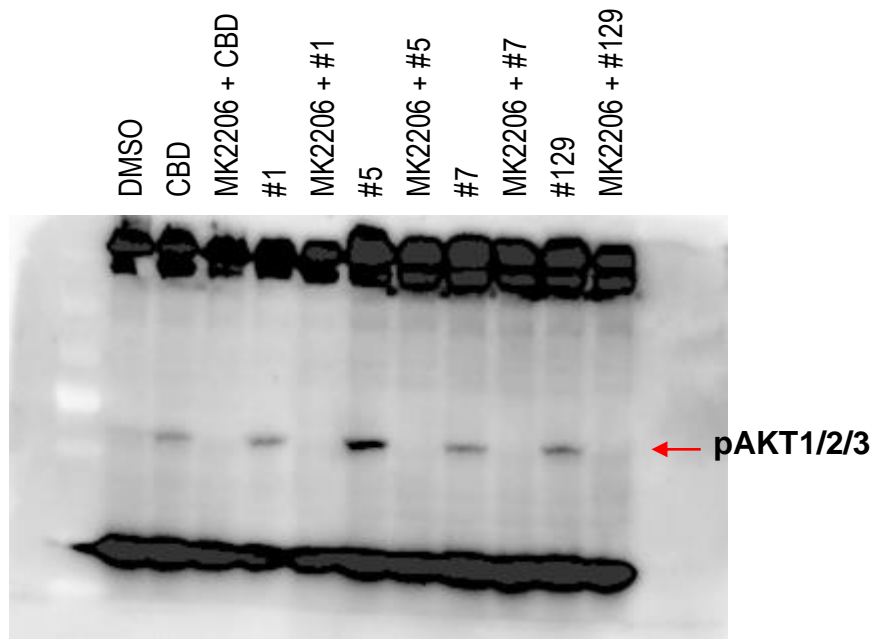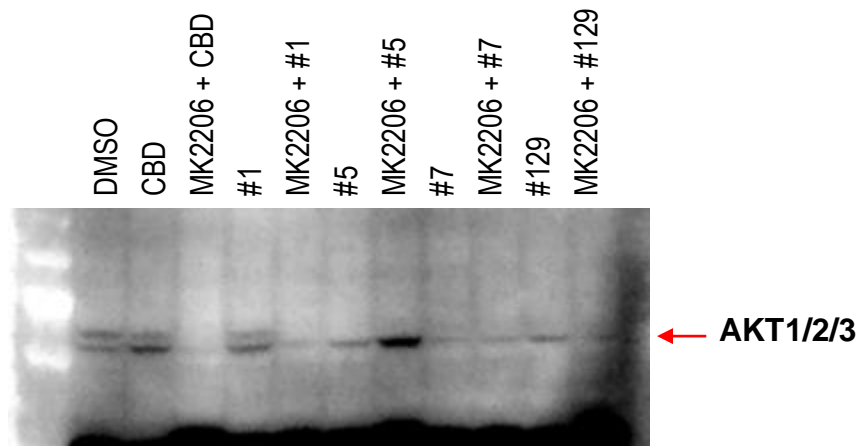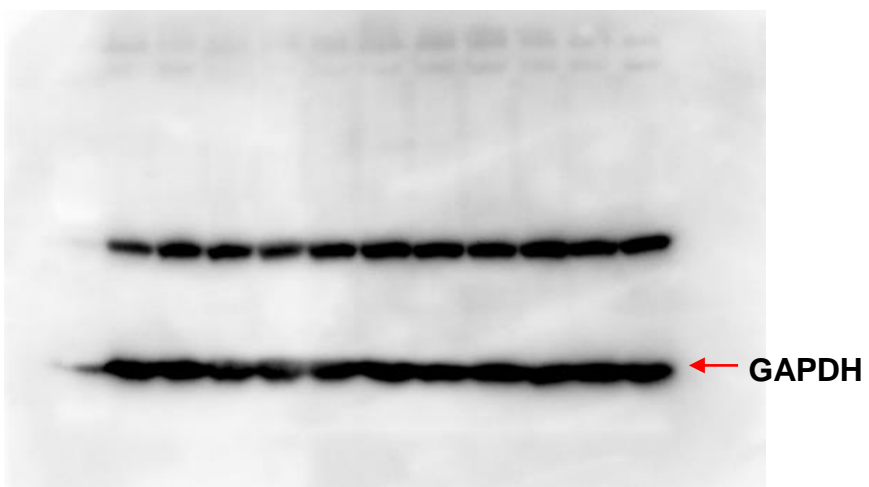

# Original image: Figure 3A

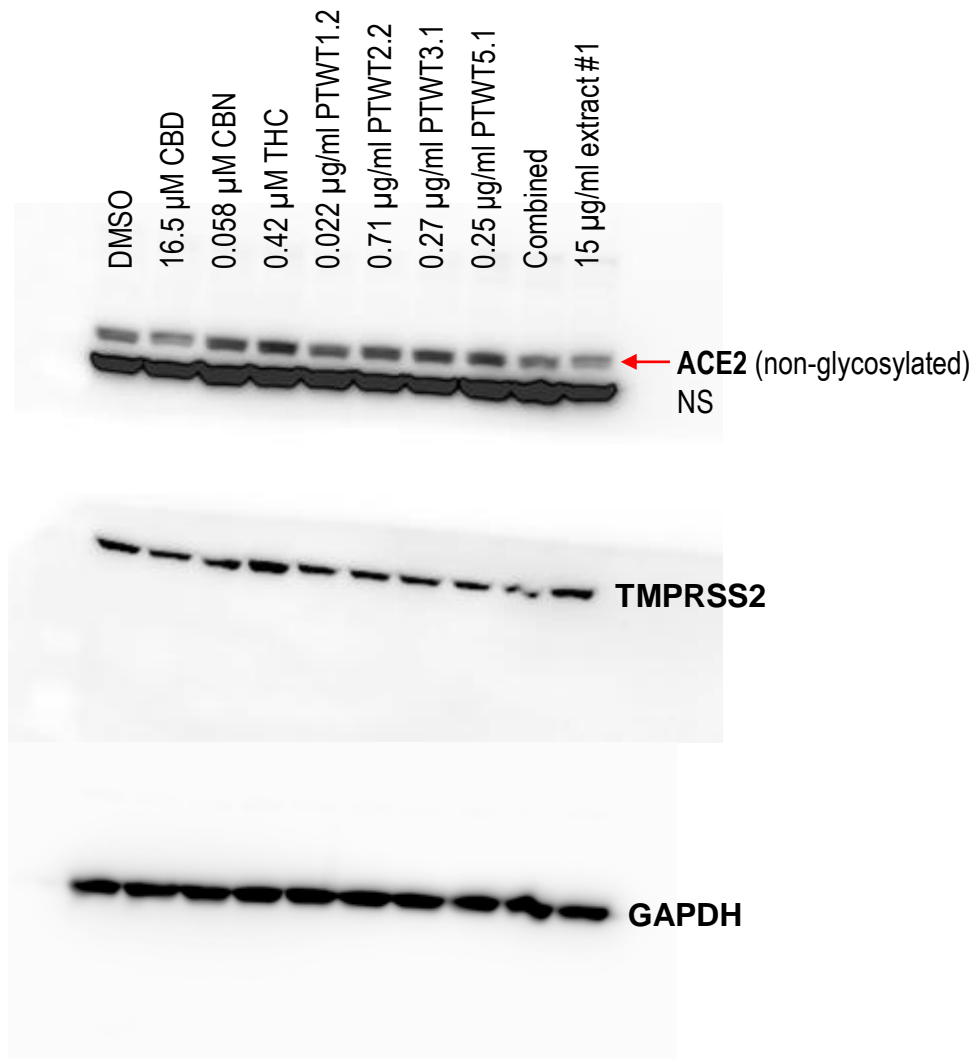

# Original image: Figure 3B

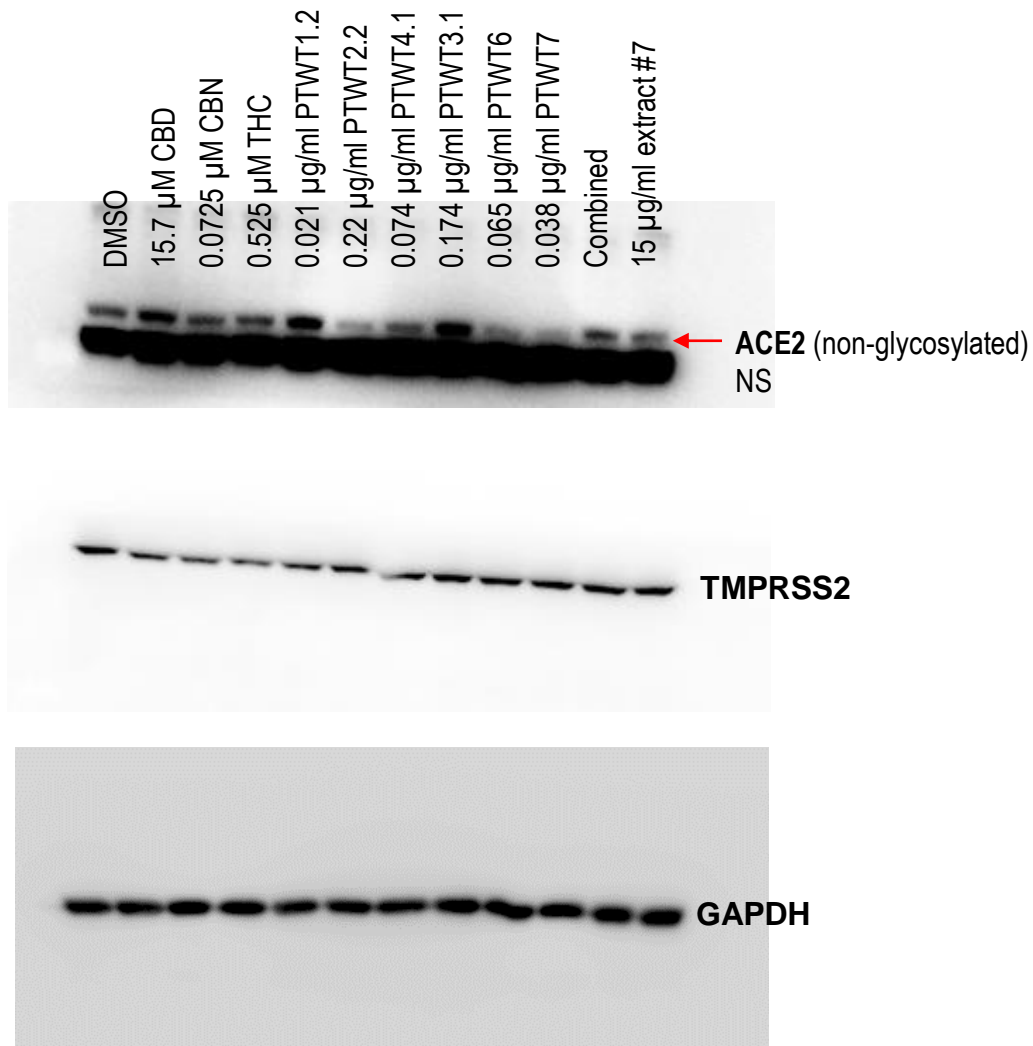

# Original image: Figure 3C

DMSO  
20  $\mu$ M CBD  
10  $\mu$ g/ml PTWT2.2  
CBD + 10  $\mu$ g/ml PTWT2.2  
20  $\mu$ g/ml PTWT2.2  
CBD + 20  $\mu$ g/ml PTWT2.2  
50  $\mu$ g/ml PTWT2.2  
CBD + 50  $\mu$ g/ml PTWT2.2  
100  $\mu$ g/ml PTWT2.2  
CBD + 100  $\mu$ g/ml PTWT2.2

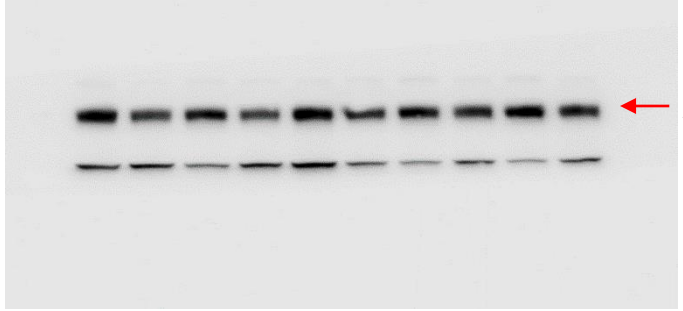

← ACE2 (Glycosylated)

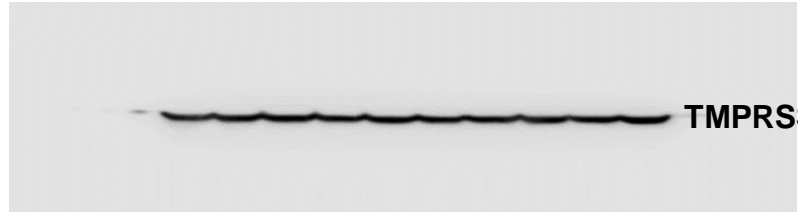

TMPRSS2

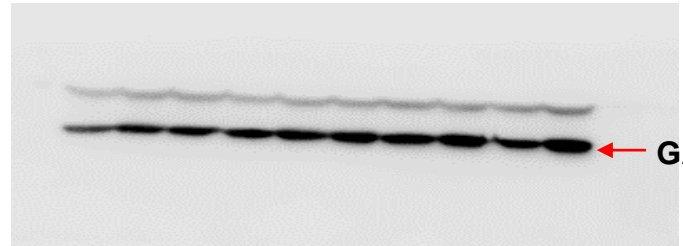

← GAPDH

DMSO  
20  $\mu$ M CBD  
10  $\mu$ g/ml PTWT1.2  
CBD + 10  $\mu$ g/ml PTWT1.2  
20  $\mu$ g/ml PTWT1.2  
CBD + 20  $\mu$ g/ml PTWT1.2  
50  $\mu$ g/ml PTWT1.2  
CBD + 50  $\mu$ g/ml PTWT1.2  
100  $\mu$ g/ml PTWT1.2  
CBD + 100  $\mu$ g/ml PTWT1.2

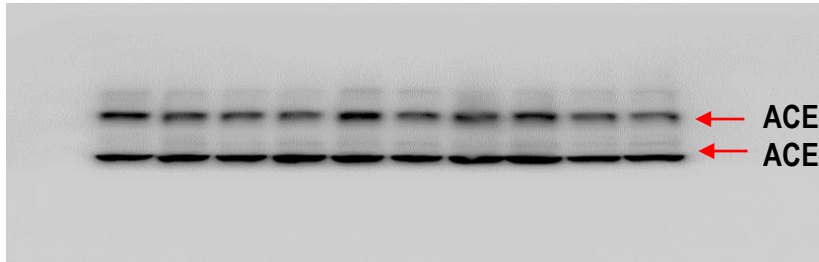

← ACE2 (Glycosylated)  
← ACE2 (non-glycosylated)

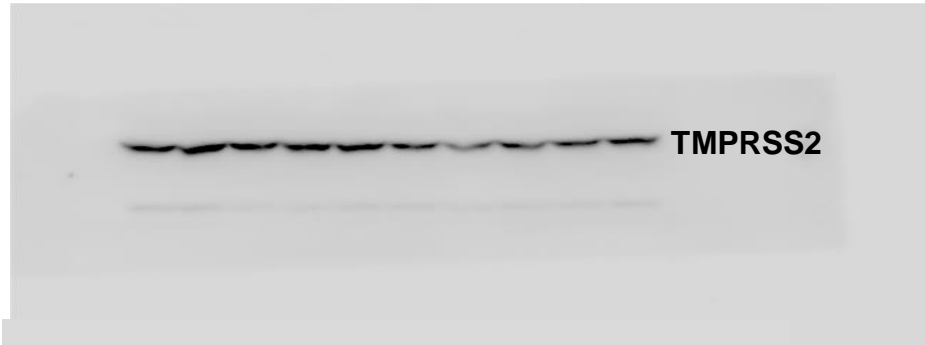

TMPRSS2

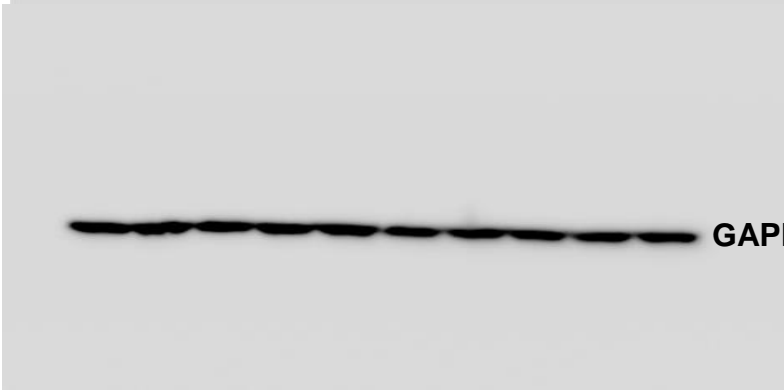

GAPDH

Original image: Figure 4A

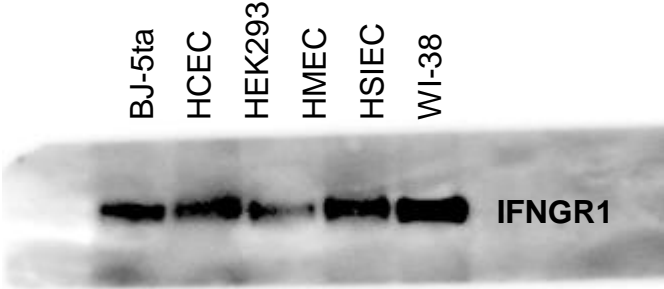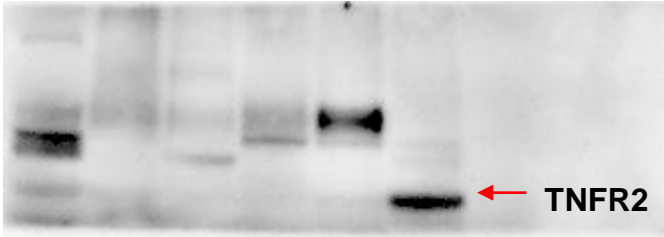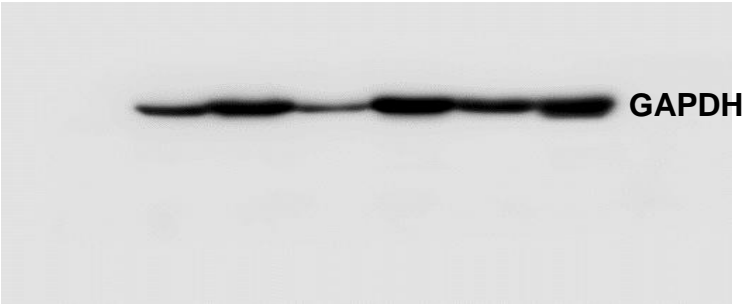

# Original image: Figure 4C and 4D

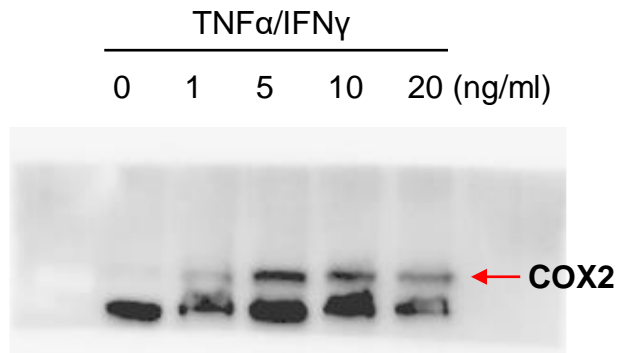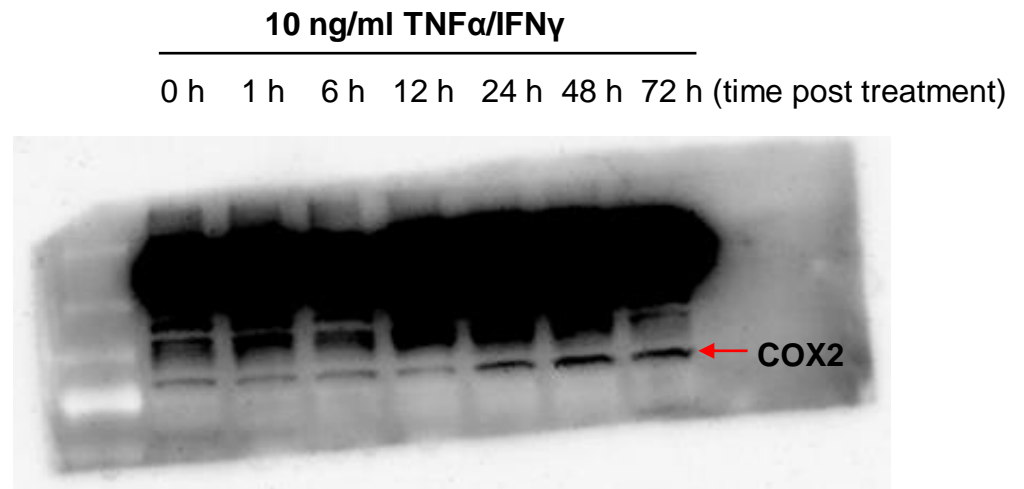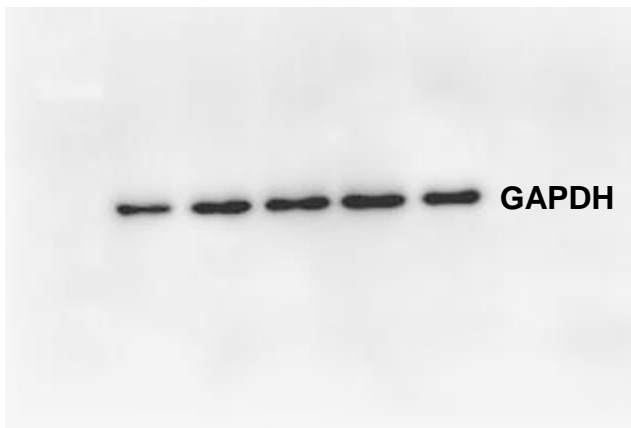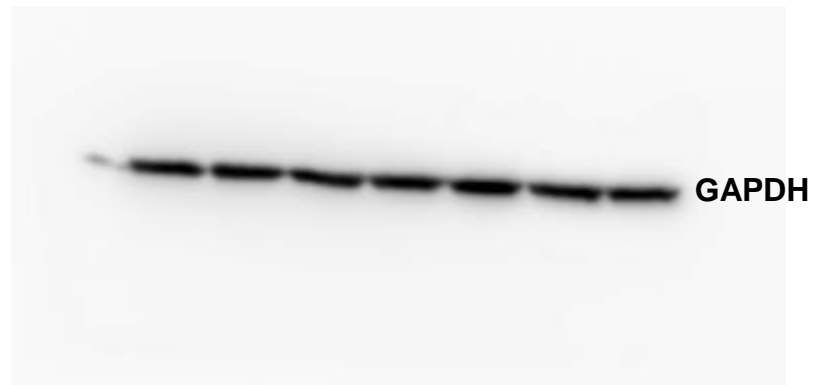

# Original image: Figure 4E and 4F

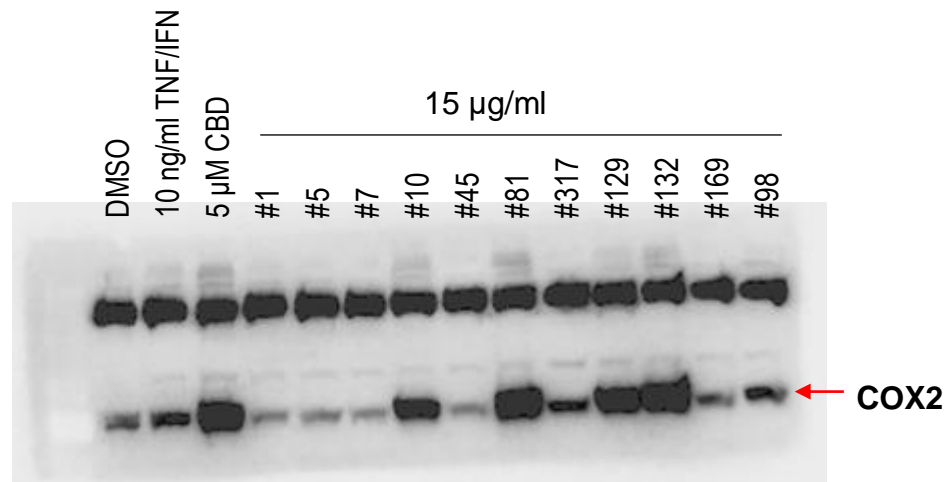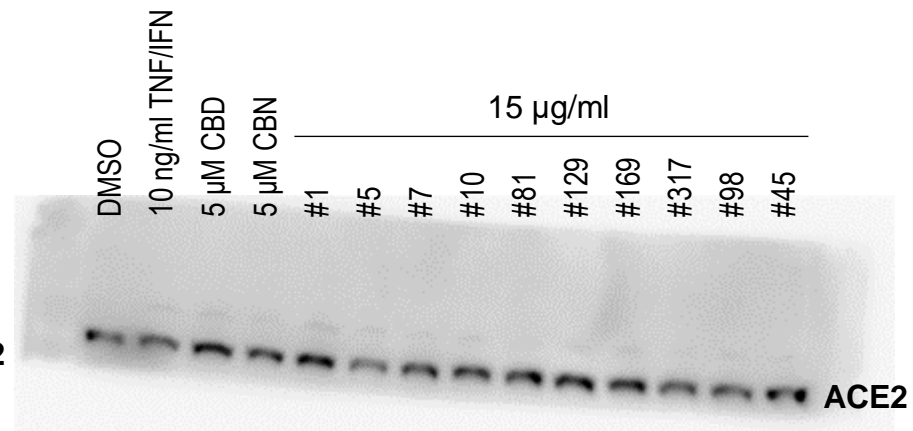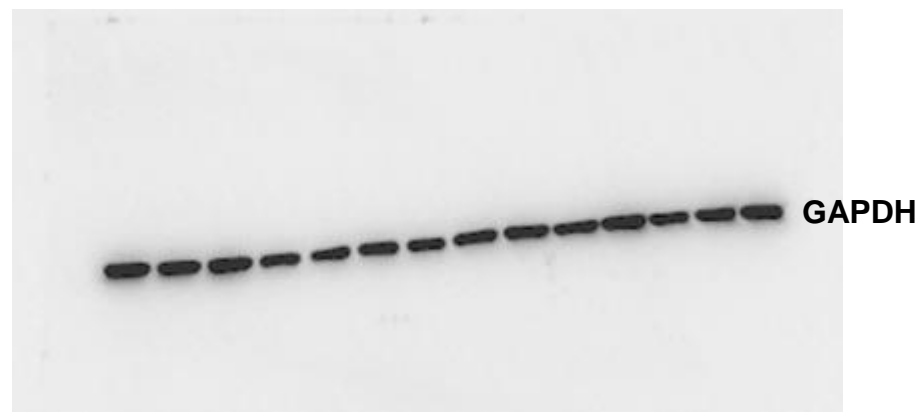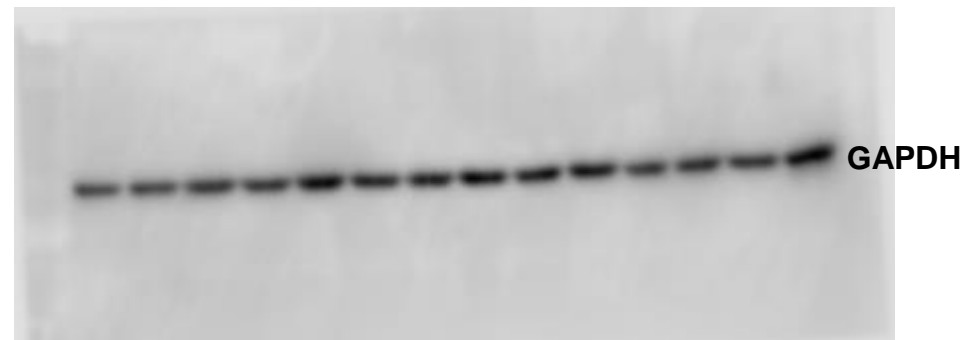

Original image: Figure 5A

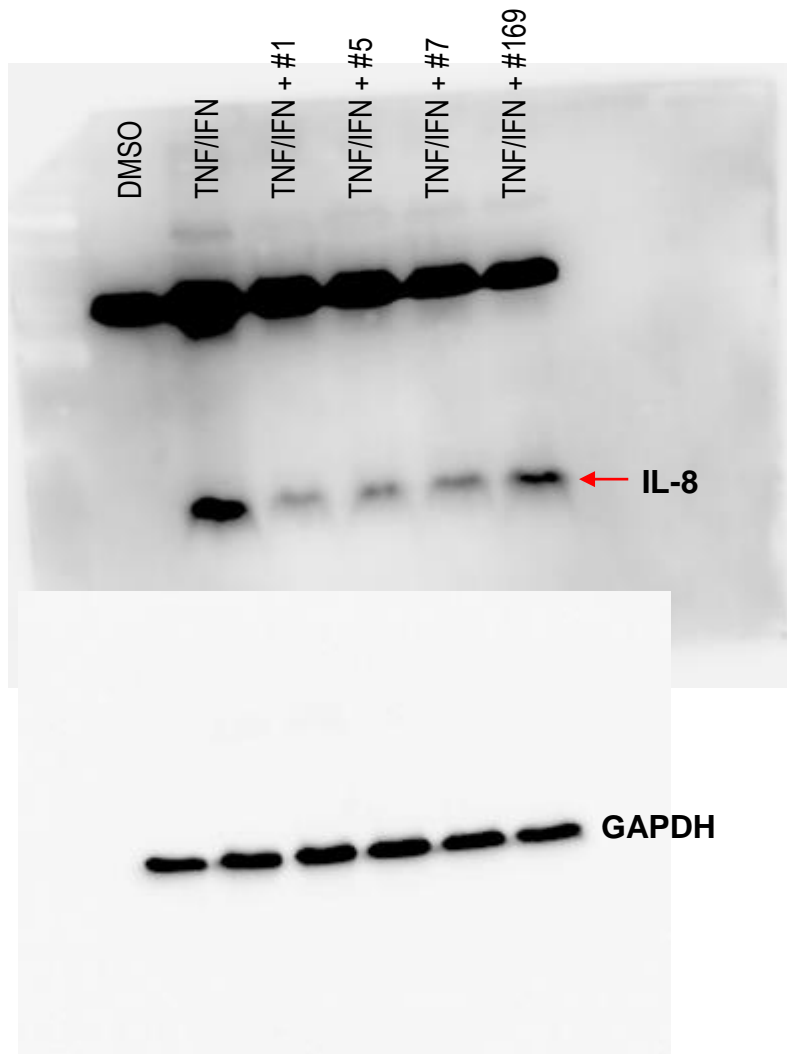

# Original image: Figure 5B

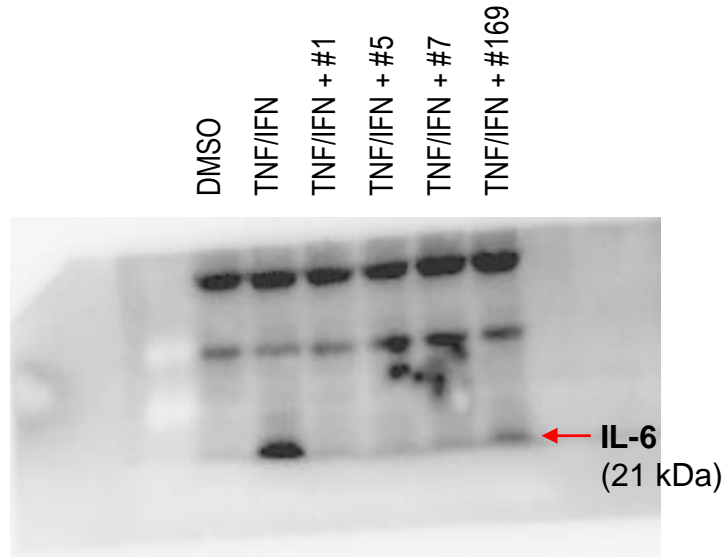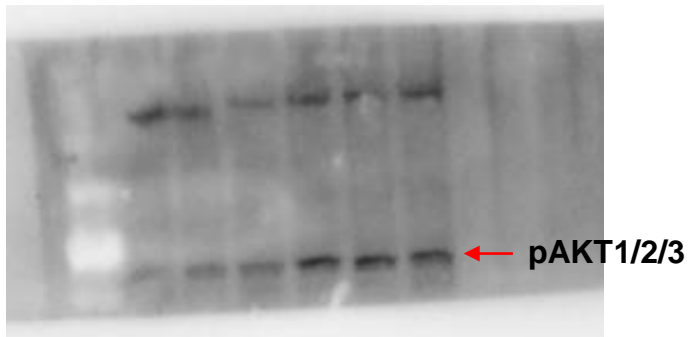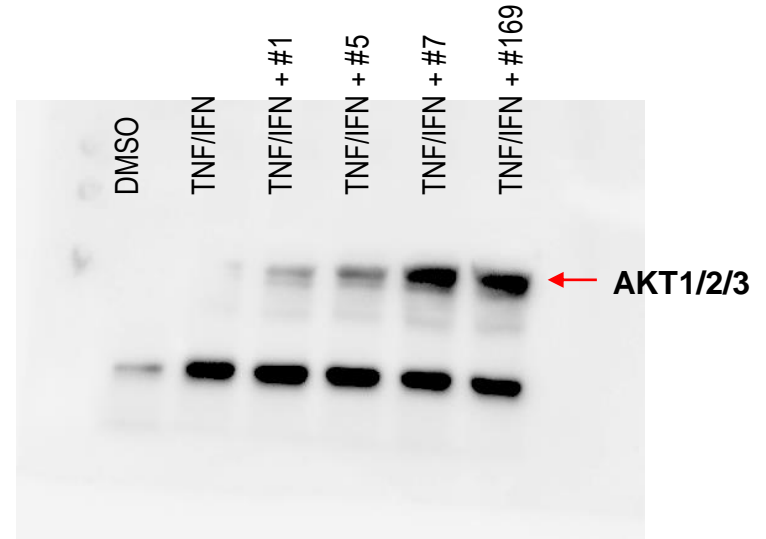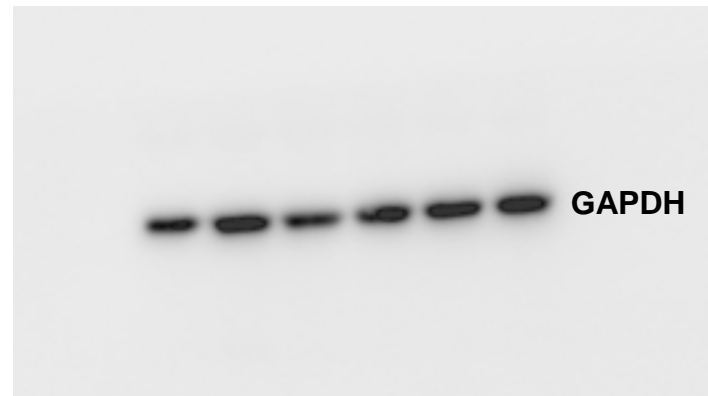

# Original image: Figure 5C

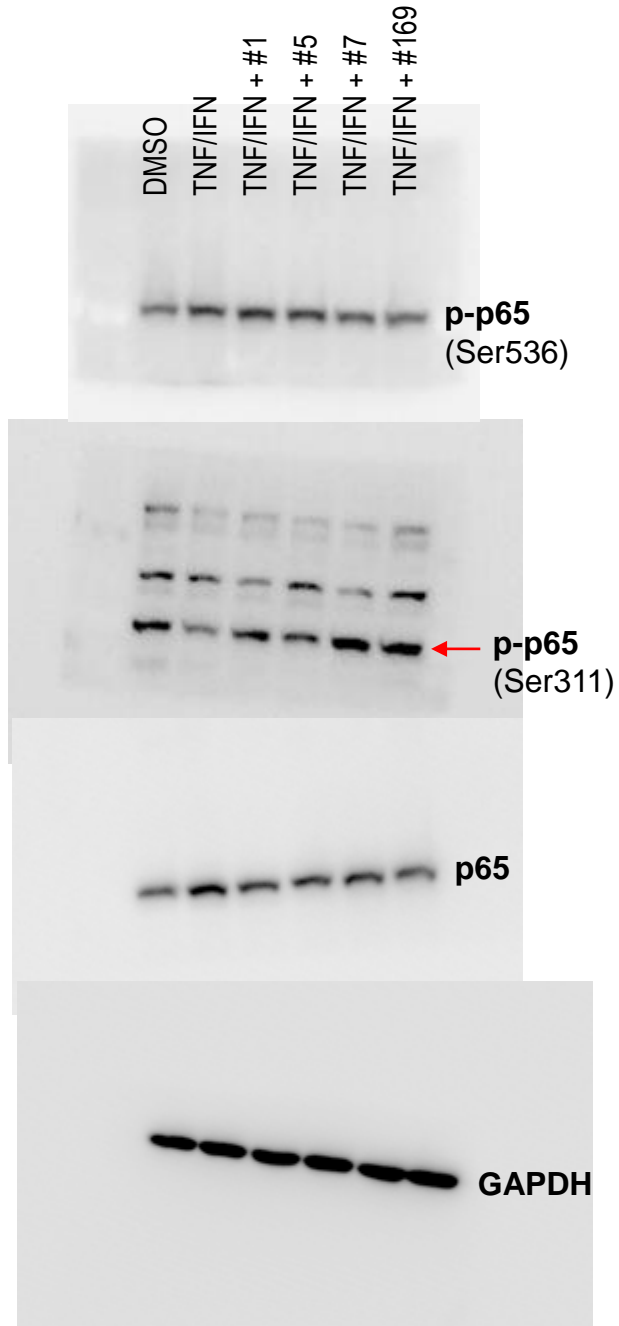

# Original image: Figure 5G

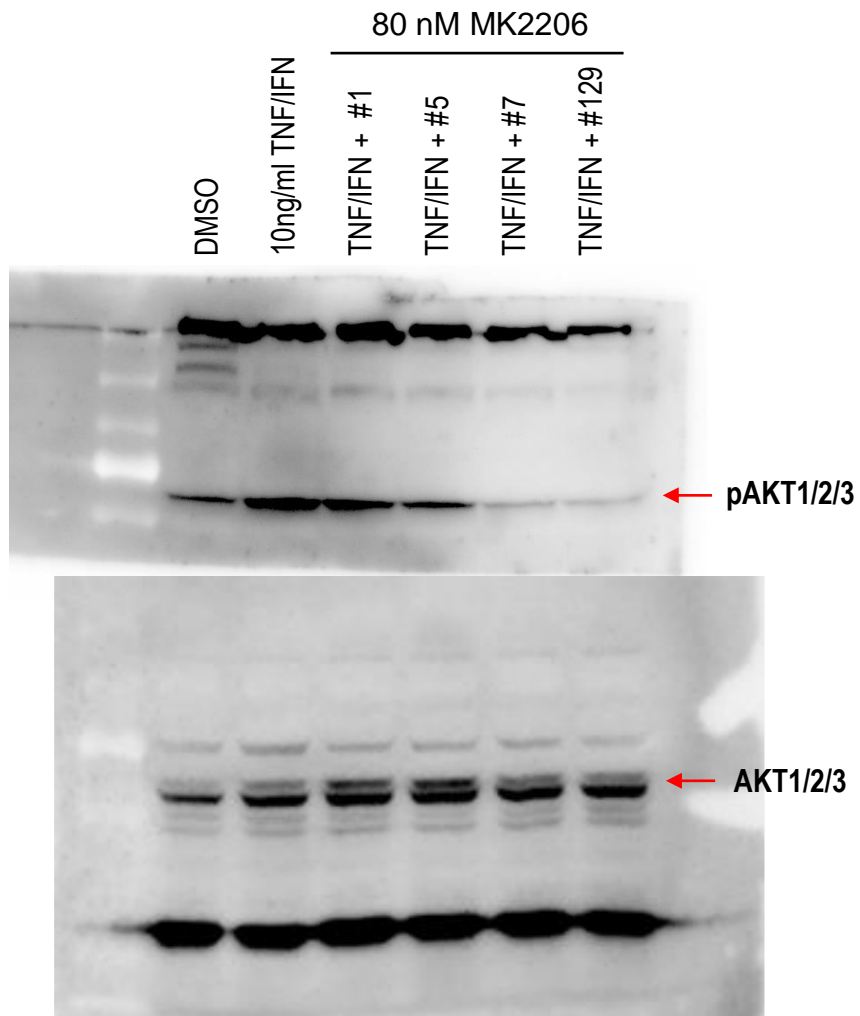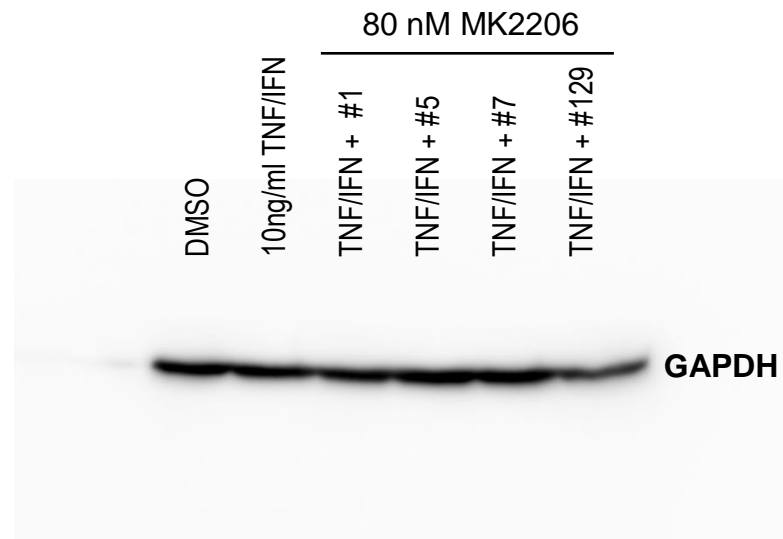

# Original image: Figure 6A

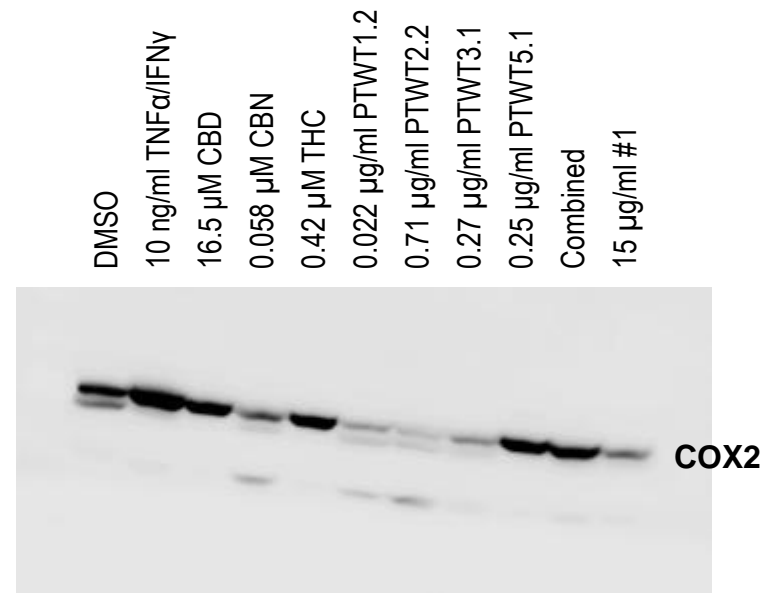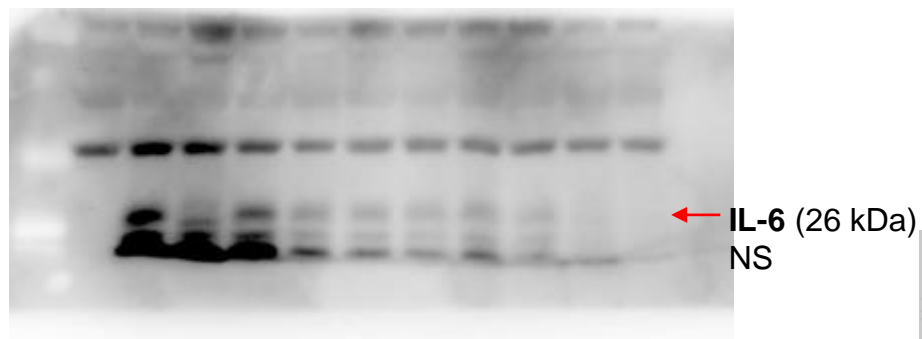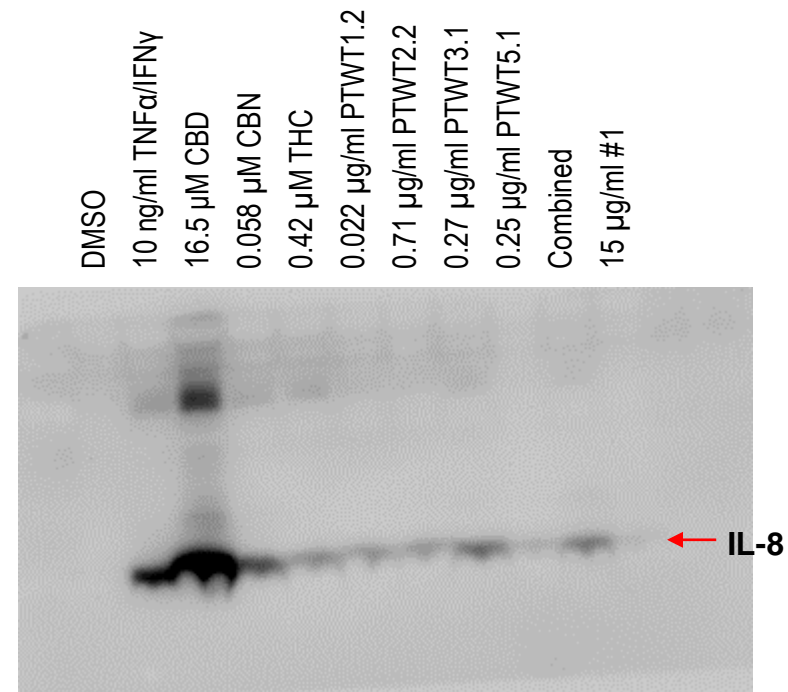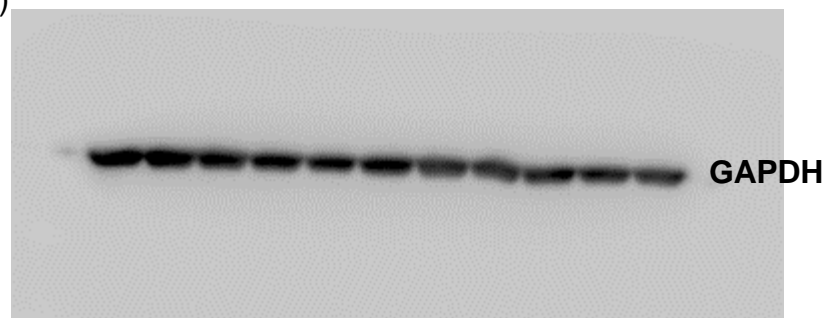

# Original image: Figure 6B

DMSO  
10 ng/ml TNF $\alpha$ /IFN $\gamma$   
15.7  $\mu$ M CBD  
0.0725  $\mu$ M CBN  
0.525  $\mu$ M THC  
0.021  $\mu$ g/ml PTWT1.2  
0.22  $\mu$ g/ml PTWT2.2  
0.074  $\mu$ g/ml PTWT4.1  
0.174  $\mu$ g/ml PTWT3.1  
0.065  $\mu$ g/ml PTWT6  
0.038  $\mu$ g/ml PTWT7  
Combined  
15  $\mu$ g/ml extract #7

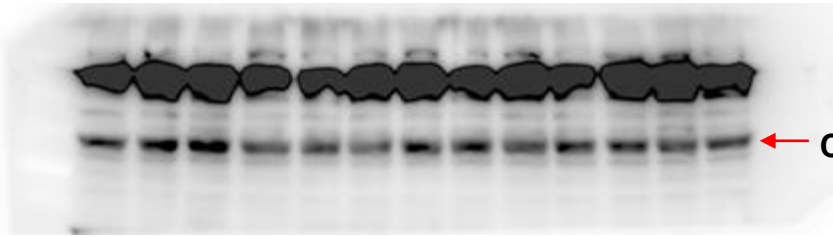

← COX2

DMSO  
10 ng/ml TNF $\alpha$ /IFN $\gamma$   
15.7  $\mu$ M CBD  
0.0725  $\mu$ M CBN  
0.525  $\mu$ M THC  
0.021  $\mu$ g/ml PTWT1.2  
0.22  $\mu$ g/ml PTWT2.2  
0.074  $\mu$ g/ml PTWT4.1  
0.174  $\mu$ g/ml PTWT3.1  
0.065  $\mu$ g/ml PTWT6  
0.038  $\mu$ g/ml PTWT7  
Combined  
15  $\mu$ g/ml extract #7

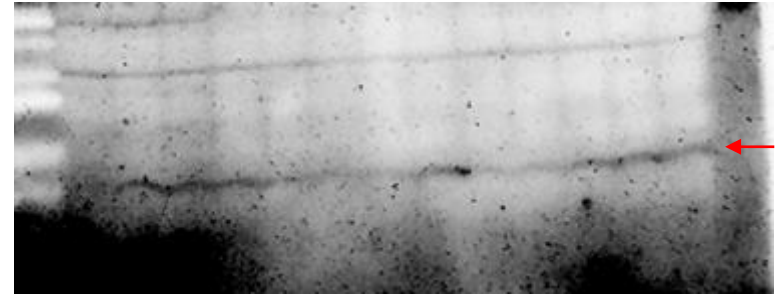

← IL-8

← IL-6 (34 kDa)

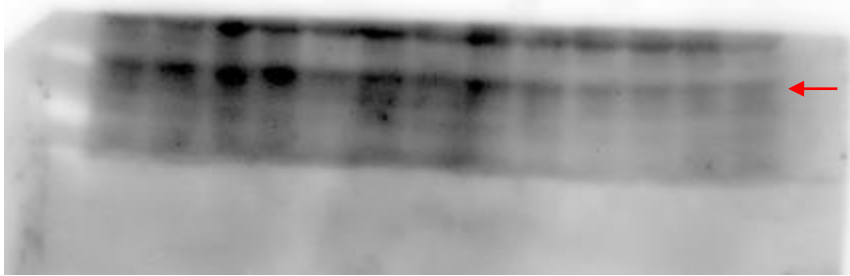

GAPDH

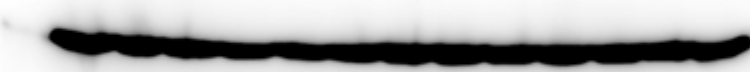

# Original image: Figure S3A and S3B

Untransfected/DMSO  
Negative control A/DMSO  
miR-200c-3p inhibitor/DMSO  
Negative control A/CBD  
miR-200c-3p inhibitor/CBD  
Negative control A/#1  
miR-200c-3p inhibitor/#1  
Negative control A/#5  
miR-200c-3p inhibitor/#5  
Negative control A/#7  
miR-200c-3p inhibitor/#7  
Negative control A/#129  
miR-200c-3p inhibitor/#129

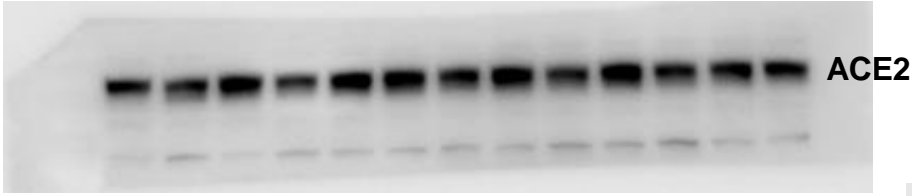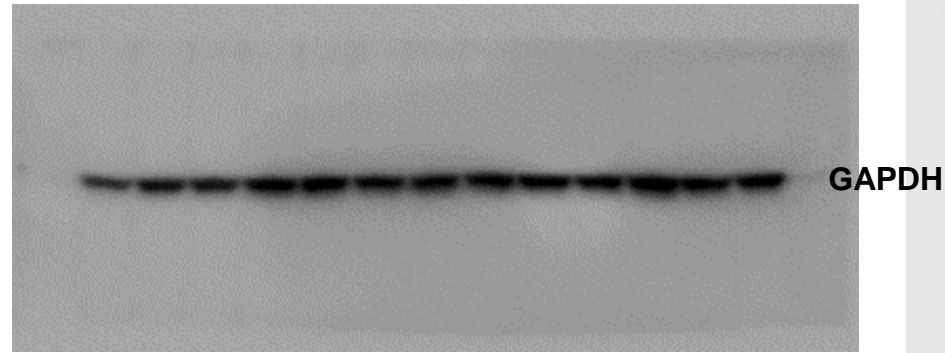

Untransfected/DMSO  
Negative control A/DMSO  
Let-7a-5p inhibitor/DMSO  
Negative control A/CBD  
Let-7a-5p inhibitor/CBD  
Negative control A/#1  
Let-7a-5p inhibitor/#1  
Negative control A/#5  
Let-7a-5p inhibitor/#5  
Negative control A/#7  
Let-7a-5p inhibitor/#7  
Negative control A/#129  
Let-7a-5p inhibitor/#129

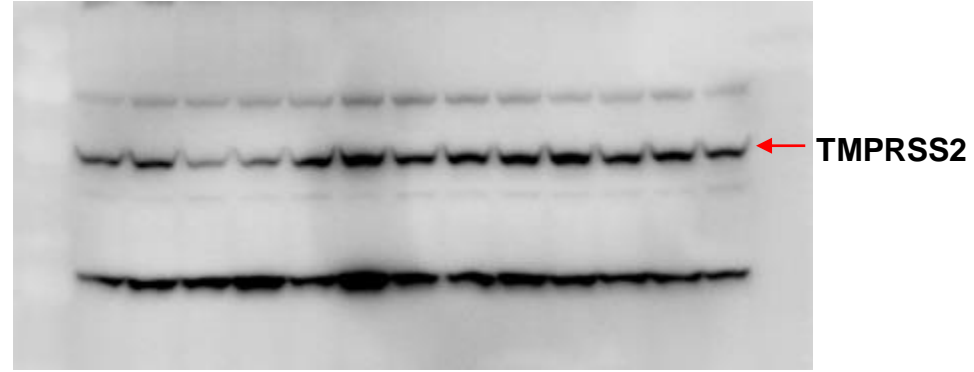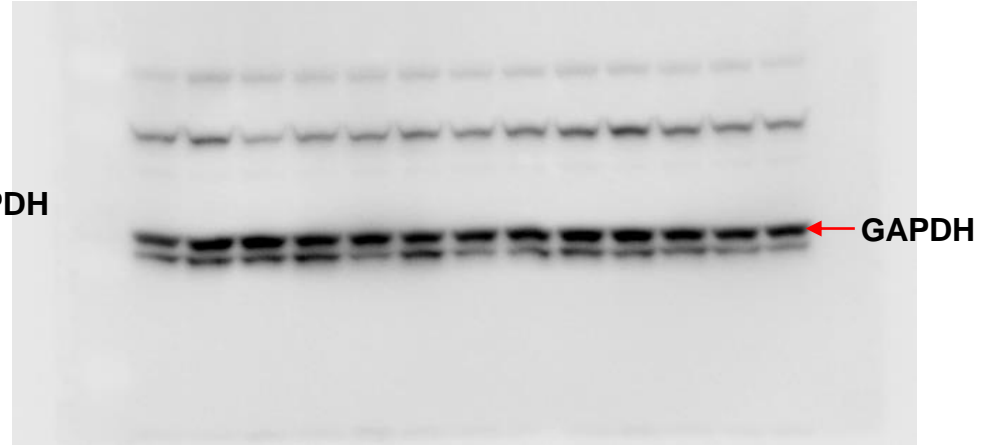

# Original image: Figure S4A

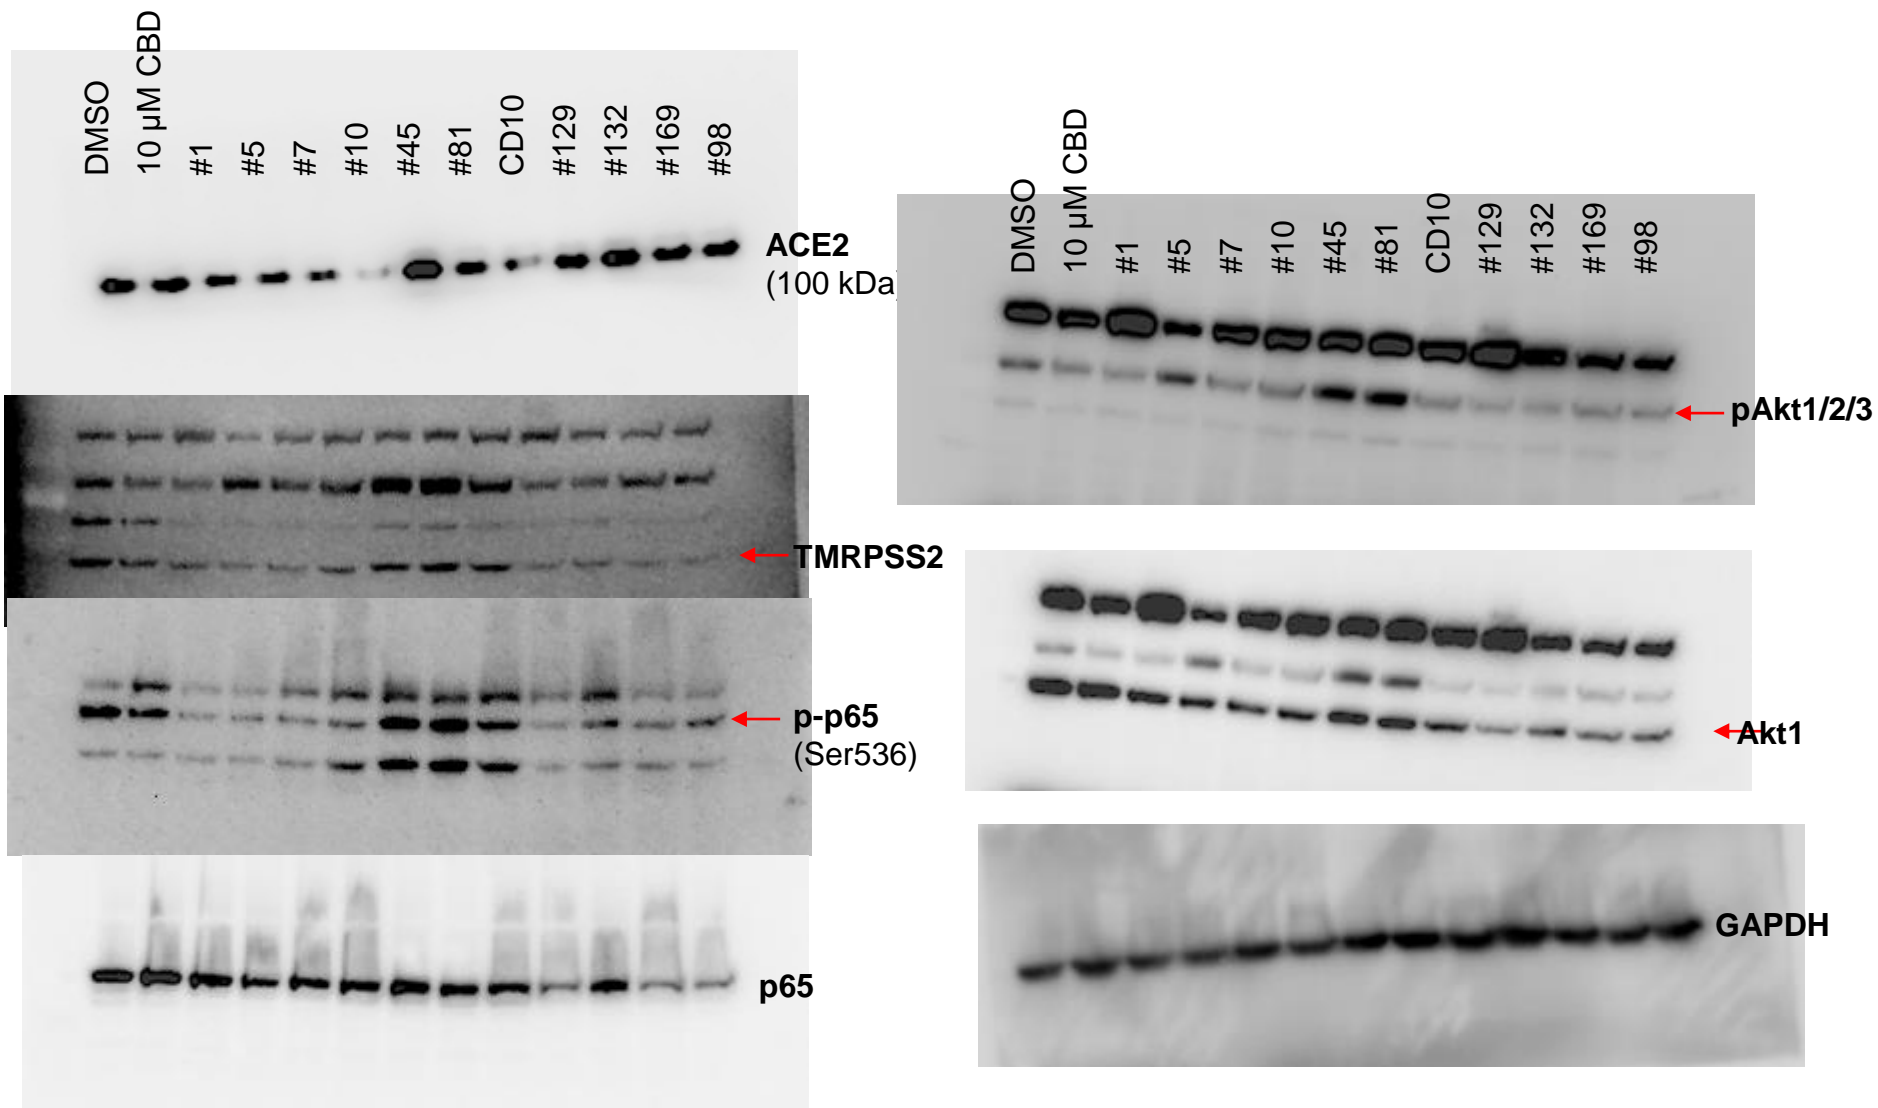

# Original image: Figure S5A

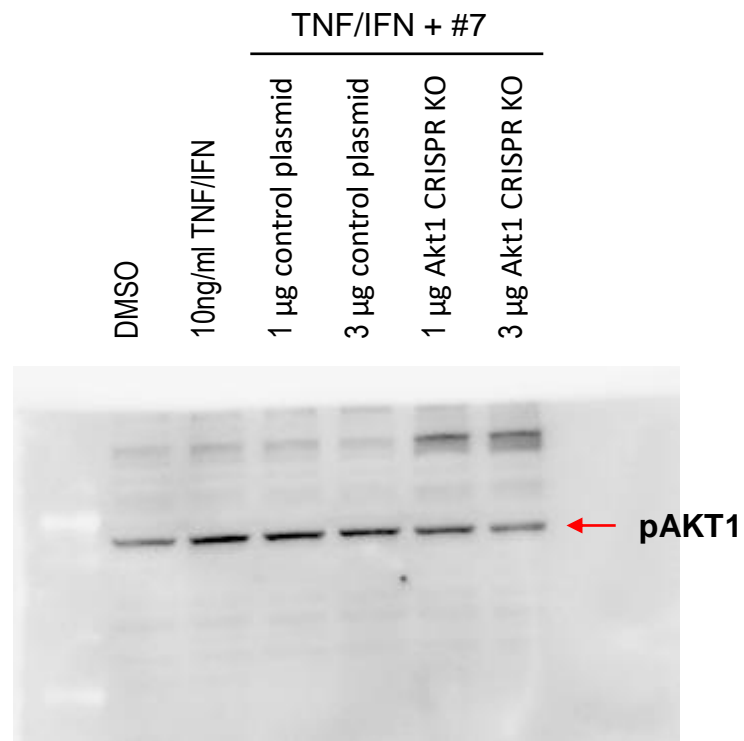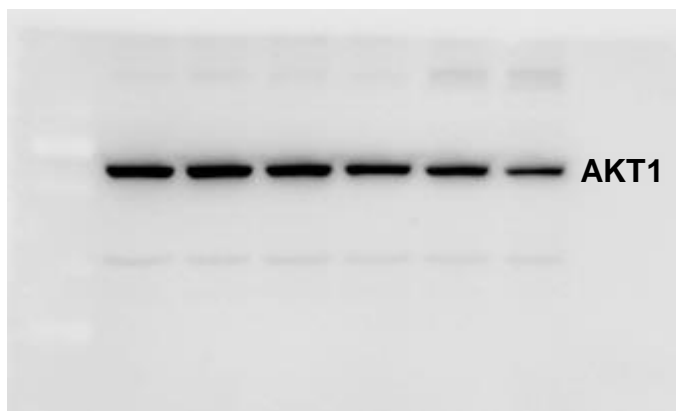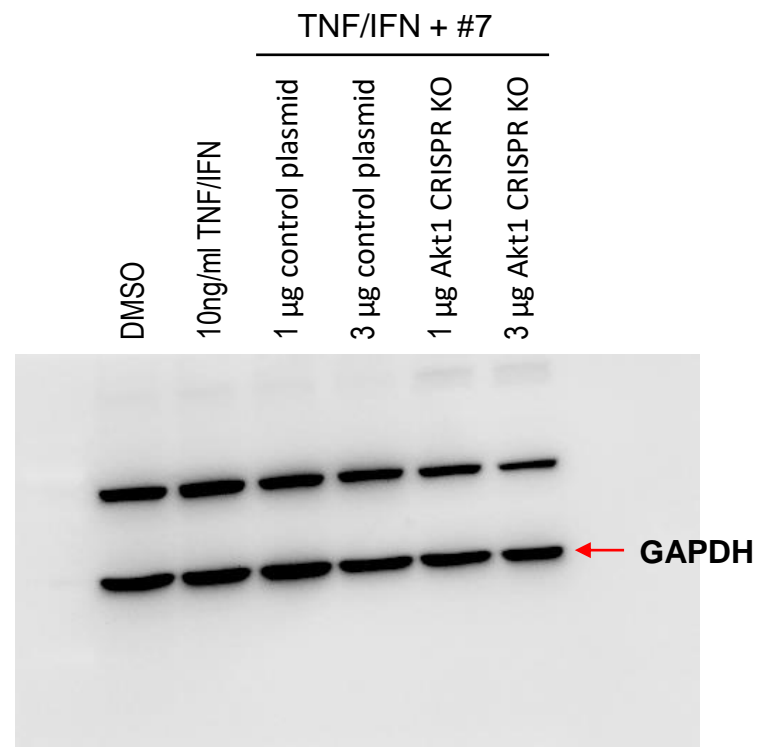

Original image: Figure S7

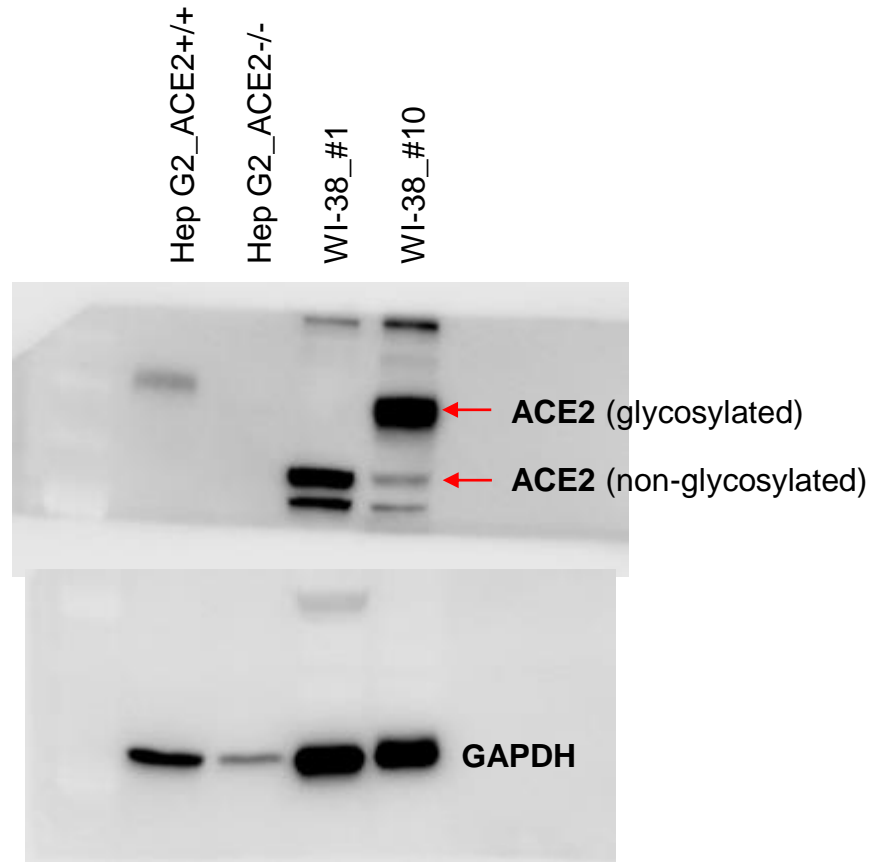

Supplement: MOESM3 [file 41420_2022_876_MOESM3_ESM.pdf]
